# Supplementary material for: Synthesis of (−)-Gloeosporone, a fungal autoinhibitor of spore germination using a π-allyltricarbonyliron lactone complex as a templating architecture for 1,7-diol construction
Source: Royal Society of Chemistry journal article supplement (doi:10.1039/b308793j), 2003-01-01
Supplement: b308793j.pdf [file b308793j.pdf]

Synthesis of (-)-Gloeosporone, a fungal autoinhibitor of spore germination using a  $\pi$ -allyltricarboxyliron lactone complex as a templating architecture for 1,7-diol construction.

---

Steven V. Ley,\* Ed Cleator, Jürgen Harter and Christopher J. Hollowood.

#### Preparation of lithium naphthalenide solution

A suspension of naphthalene (6.5g, 50.7 mmol) and lithium (1.15g, 50.0 mmol, 30 wt.% dispersion in mineral oil) in THF (50 cm<sup>3</sup>) was sonicated for 30 min to yield a dark green solution (1 mol dm<sup>-3</sup>).

(7*E*,9*E*,6*R*,12*R*)-14-benzyloxy-12-(*tert*-butyldimethyl-silanyl-oxy)-6-hydroxy-tetradeca-7,9-diene **7-E,E**, (7*E*,9*Z*,6*R*,12*R*)-14-benzyloxy-12-(*tert*-butyldimethylsilanyloxy)-6-hydroxy-tetradeca-7,9-diene **7-E,Z** and (7*Z*,9*E*,6*R*,12*R*)-14-benzyloxy-12-(*tert*-butyldimethylsilanyloxy)-6-hydroxy-tetradeca-7,9-diene **7-Z,E**

Acetate **6** (55 mg, 0.08 mmol, MW=672.66) in THF (1 ml) was cooled to -78°C and lithium naphthalenide (5 eq., 0.41 mmol, 0.41 ml, 1M solution in THF, freshly prepared according to the above method) was added. The solution was stirred at this temperature overnight. The solution was warmed to room temperature and filtered through a pad of silica, washing with Et<sub>2</sub>O, the solvent was then removed and the residue purified by flash column chromatography (eluent PE:Et<sub>2</sub>O 5:1 to 1:1, gradient) to afford an inseparable mixture of dienes **7-E,E**, **7-E,Z** and **14-Z,E** (0.5 : 0.2 : 0.3) as an oil (36 mg, 0.08 mmol, 98%);  $\nu_{\max}$  (neat)/cm<sup>-1</sup>: 3358 (OH), 2927, 2855, 2079, 1973, 1455, 1361, 1252, 1092, 1043, 989, 835, 774, 734, 697;  $\delta_{\text{H}}$  (400 MHz, CDCl<sub>3</sub>): 0.05 (3H, s, Si(CH<sub>3</sub>)), 0.08 (3H, s, Si(CH<sub>3</sub>)), 0.84 (9H, s, SiC(CH<sub>3</sub>)<sub>3</sub>), 0.89 (3H, t, *J* 7.1, 1-H x 3), 1.21-1.63 (8H, m, 2-H x 2, 3-H x 2, 4-H x 2, 5-H x 2), 1.75 (2H, m, 11-H x 2), 2.26 (2H, m, 13-H x 2), 3.54 (1H, s, OH), 3.58 (1H, m, 12-H), 3.91 (0.5H, m, 6-H x 0.5), 4.12 (0.5H, m, 6-H x 0.5), 4.49 (2H, app. q, *J* 11.7, CH<sub>2</sub>C<sub>6</sub>H<sub>5</sub>), 5.29 (0.3H, m, 7-H x 0.3), 5.49 (0.2H, m, 10-H x 0.2), 5.58 (0.5H, dd, *J* 15.0, 6.9, 7-H x 0.5), 5.69 (1H, m, 7-H x 0.2, 10-H x 0.8), 6.04 (1H, m, 8-H x 0.3, 9-H x 0.7), 6.17 (0.5H, dd, *J* 15.3 10.2, 8-H x 0.5), 6.32 (0.3H, dd, *J* 15.0 10.9, 9-H x 0.3),

Supplementary Material (ESI) for Organic & Biomolecular Chemistry  
This journal is © The Royal Society of Chemistry 2003

6.44 (0.2H, dd,  $J$  15.0 10.9, 8-H x 0.2), 7.24-7.38 (5H, m,  $\text{CH}_2\text{C}_6\text{H}_5$ );  $\delta_{\text{C}}$  (100 MHz,  $\text{CDCl}_3$ ): 138.5, 134.3, 131.9, 130.6, 128.3, 127.7, 127.4, 125.8, 72.9, 72.7, 69.2, 67.0, 41.2, 41.0, 37.4, 37.3, 36.9, 31.8, 25.8 ( $\text{SiC}(\text{CH}_3)_3$ ), 25.1, 24.9, 22.6, 18.1 ( $\text{SiC}(\text{CH}_3)_3$ ), 14.0, -4.3 ( $\text{Si}(\text{CH}_3)$ ), -4.7 ( $\text{Si}(\text{CH}_3)$ );  $m/z$  (ES) Found:  $[\text{MH}]^+$  447.3267.  $\text{C}_{27}\text{H}_{47}\text{O}_3\text{Si}$  requires  $MH$ , 447.3294.
